# Supplementary material for: Solvent-free transformation of levulinic acid into valeric acid and its esters using the nickel phosphine complex and metal triflate co-catalytic system
Source: Royal Society of Chemistry journal article supplement (doi:10.1039/d2gc00518b), 2022-01-01
Supplement: d2gc00518b1.pdf [file d2gc00518b1.pdf]

Electronic Supplementary Information for

**Solvent-free transformation of levulinic acid into valeric acid  
and its esters using nickel phosphine complex and metal triflate  
co-catalytic system**

Lijin Gan, Chenqiang Deng, Jin Deng \*

*CAS Key laboratory of Urban Pollutant Conversion, Anhui Province Key Laboratory  
of Biomass Clean Energy, Department of Applied Chemistry, University of Science and  
Technology of China, Hefei, Anhui 230026, China.*

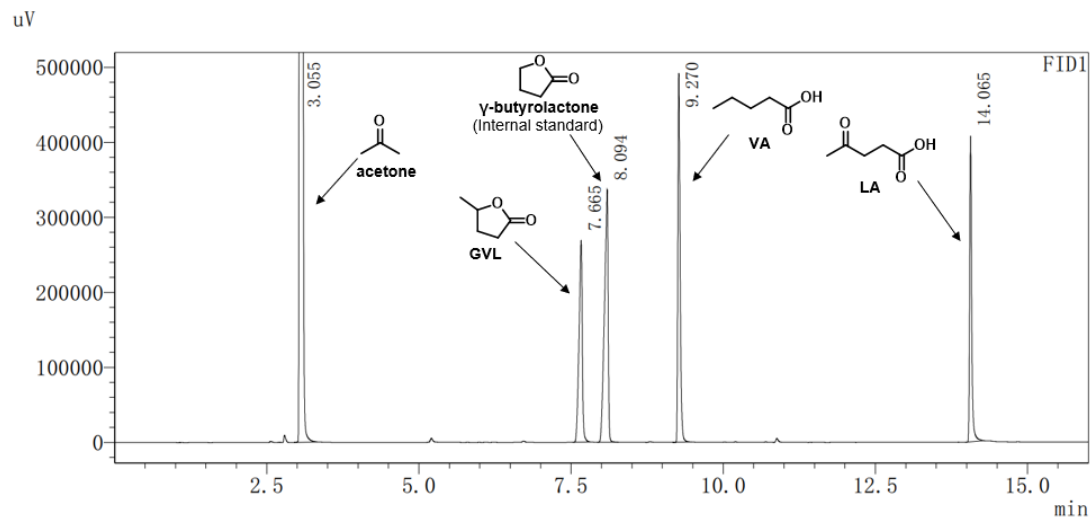

**Fig.S1** Gas chromatogram of the reaction.

**Table S1 GVL as substrate <sup>a</sup>**

| entry          | ligands          | Conversion (%) | VA Yield (%) <sup>b</sup> |
|----------------|------------------|----------------|---------------------------|
| 1              | triphos          | 100            | 99.0                      |
| 2              | PP <sub>2</sub>  | 84.3           | 83.4                      |
| 3              | PP <sub>3</sub>  | 79.4           | 79.0                      |
| 4              | DPPB             | 8.0            | -                         |
| 5              | DPPE             | 2.5            | -                         |
| 6              | DCyPE            | 4.0            | -                         |
| 7              | R-BINAP          | 5.4            | 4.7                       |
| 8              | DPPP             | 3.0            | -                         |
| 9 <sup>c</sup> | PPh <sub>3</sub> | 4.9            | -                         |

<sup>a</sup>reaction conditions: 6 mmol GVL, 1 mol% Ni(OAc)<sub>2</sub>·4H<sub>2</sub>O, 1 mol% ligand, 2 mol% Zr(OTf)<sub>4</sub>, 180°C, 1 MPa, 10 h, solvent-free. <sup>b</sup>Yield determined by GC analysis. <sup>c</sup>2 mol% ligand.

**Table S2 Effect of ligands at the use of 1 mol% Zr(OTf)<sub>4</sub><sup>a</sup>**

| Entry          | Ligand           | Conversion (%) | Yields (%) <sup>b</sup> |      |
|----------------|------------------|----------------|-------------------------|------|
|                |                  |                | VA                      | GVL  |
| 1              | triphos          | 100            | 37.2                    | 62.3 |
| 2              | PP <sub>2</sub>  | 100            | 36.7                    | 5.6  |
| 3              | PP <sub>3</sub>  | 100            | 34.2                    | 7.4  |
| 4              | DPPB             | 100            | -                       | 99.0 |
| 5              | DPPE             | 100            | 3.0                     | 96.0 |
| 6              | DCyPE            | 100            | 2.5                     | 96.6 |
| 7              | R-BINAP          | 100            | -                       | 47.2 |
| 8              | DPPP             | 100            | 4.0                     | 95.1 |
| 9 <sup>c</sup> | PPh <sub>3</sub> | 100            | -                       | -    |

<sup>a</sup> Reaction conditions: 6 mmol LA, 1 mol% Ni(OAc)<sub>2</sub>·4H<sub>2</sub>O/ligand, 1 mol% Zr(OTf)<sub>4</sub>, 180°C, 1 MPa, 10 h, solvent-free. <sup>b</sup> Yield determined by GC analysis. <sup>c</sup> 2 mol% PPh<sub>3</sub>.
